# Supplementary material
Source: Elsevier journal article supplement (https://www.sciencedirect.com/science/article/pii/S0300289614000660)
Supplement: mmc1 [file S0300289614000660:mmc1.doc]

**Documento online-Tabla 2 . Porcentaje de respuestas correctas a cada uno de los ítems del cuestionario NewCastle Asthma Knowledge Questionnaire (NAKQ) de conocimientos acerca del asma.**

| **Ítem** | **Respuesta**  **válida** | **Respuestas**  **correctas** | |
| --- | --- | --- | --- |
| **n** | **%** |
| 1. ¿Cuáles son los tres síntomas principales del asma? | Tos, pitos, ahogos | 50 | 9,3% |
| 2. 1 de cada 10 niños tendrán asma en algún momento durante su infancia | V | 320 | 59,6% |
| 3. Los niños con asma tienen las vías aéreas pulmonares anormalmente sensibles | V | 382 | 71,1% |
| 4. Si un niño en una familia tiene asma, entonces casi seguro que todos sus hermanos y hermanas la padecerán también | F | 430 | 80,1% |
| 5. La mayoría de los niños con asma sufren un aumento de mucosidad cuando beben leche de vaca | F | 282 | 52,5% |
| 6. Anote todas las cosas que sabe que precipitan un ataque de asma (a veces llamados factores desencadenantes) | Alergias, resfriados y ejercicio | 6 | 1,1% |
| 7. Durante un ataque de asma los pitos pueden deberse a la contracción muscular de la pared de las vías aéreas pulmonares | V | 336 | 62,6% |
| 8. Durante un ataque de asma, los pitos pueden deberse a la inflamación del revestimiento de las vías aéreas pulmonares | V | 267 | 49,7% |
| 9. El asma daña el corazón | F | 284 | 52,9% |
| 10. Anote dos tratamientos (medicinas) para el asma que se toman regularmente todos los días para evitar que se produzcan ataques de asma | Dos de: corticoides inhalados, cromonas, motelukast, combinación de corticoides y beta-2-adrenérgico de larga acción | 30 | 5,6% |
| 11. ¿Qué tratamientos (medicinas) para el asma son útiles durante un ataque? | Dos de: beta-2-adrenérgico de acción corta, bromuro de ipratropio, corticoides orales y oxígeno | 86 | 16,0% |
| 12. Los antibióticos son una parte importante del tratamiento para la mayoría de los niños con asma | F | 380 | 70,8% |
| 13. La mayoría de niños con asma no deberían consumir productos lácteos | F | 304 | 56,6% |
| 14. Las vacunas para la alergia curan el asma | F | 410 | 76,4% |
| 15. Si una persona muere de un ataque de asma, esto normalmente quiere decir que el ataque final debió de haber comenzado tan rápidamente que no hubo tiempo para empezar ningún tratamiento | F | 284 | 52,9% |
| 16. Las personas con asma normalmente tienen “problemas de nervios” | F | 359 | 66,9% |
| 17. El asma es infeccioso (es decir, te lo puede contagiar otra persona) | F | 481 | 89,6% |
| 18. Los medicamentos inhalados para el asma (ej., Ventolín, Terbasmín) tienen menos efectos secundarios que las pastillas/jarabes | V | 170 | 31,7% |
| 19. Los ciclos cortos de corticoides orales (como Estilsona, Dacortín, Prednisona) habitualmente causan efectos secundarios importantes | F | 230 | 42,8% |
| 20. Algunos tratamientos para el asma (ej. Ventolín) dañan el corazón | F | 343 | 63,9% |
| 21. Un niño de 5 años sufre un ataque de asma y toma dos inhalaciones de Ventolín inhalador. Después de 5 minutos no mejora. Dé algunas razones de por qué puede haber pasado esto. | Dos de: medicamento caducado, vacío, mala técnica, dosis insuficiente | 21 | 3,9% |
| 22. Durante un ataque de asma que están tratando en casa su hijo necesita el inhalador con cámara (o mascarilla) cada 2 horas. Está mejorando pero después de 2 horas respira con dificultad. Teniendo en cuenta que el niño no empeora, es correcto continuar con el tratamiento cada 2 horas. | F | 171 | 31,8% |
| 23. Anote formas de ayudar a prevenir ataques de asma mientras se hace ejercicio | Dos de: calentamiento, beta-2 de corta acción o cromonas antes de ejercicio, mejorar el control del asma, respirar por la nariz, ambiente húmerdo y cálido | 27 | 5,0% |
| 24. Los niños con asma se hacen adictos a sus medicinas | F | 300 | 55,9% |
| 25. La natación es el único deporte adecuado para los asmáticos | F | 398 | 74,1% |
| 26. El hecho de que los padres fumen puede empeorar el asma del hijo/a | V | 472 | 87,9% |
| 27. Con el tratamiento adecuado, la mayoría de los niños con asma deberían llevar una vida normal sin restricciones en sus actividades | V | 458 | 85,3% |
| 28. La mejor manera de medir la gravedad del asma de un niño es que el médico le escuche el pecho | F | 254 | 47,3% |
| 29. El asma es normalmente más problemática durante la noche que durante el día | V | 248 | 46,2% |
| 30. La mayoría de los niños con asma padecen un enlentecimiento de su crecimiento | F | 365 | 68,0% |
| 31. Los niños con síntomas frecuentes de asma deberían tomar medicinas preventivas | V | 300 | 55,9% |

F: Falso; V: verdadero

n: tamaño muestral

**Documento online-Tabla 2. Porcentaje de respuestas correctas a cada uno de los ítems del cuestionario NewCastle Asthma Knowledge Questionnaire (NAKQ) de conocimientos acerca del asma.**
