# Supplementary material
Source: Elsevier journal article supplement (https://www.sciencedirect.com/science/article/pii/S0300289614000660)
Supplement: mmc2 [file S0300289614000660:mmc2.doc]

**Documento online-Tabla 4. Fiabilidad test-retest del cuestionario NewCastle Asthma Knowledge Questionnaire (NAKQ) de conocimientos acerca del asma en una muestra de n=48** profesores.

|  | **% respuestas**  **correctas** | |  |  |
| --- | --- | --- | --- | --- |
|  | **1º test** | **2º test** | **% acuerdo** | **Kappa** |
| 1. ¿Cuáles son los tres síntomas principales del asma? | 12,5% | 12,5% | 100% | 1,000 |
| 2. 1 de cada 10 niños tendrán asma en algún momento durante su infancia | 75,0% | 72,9% | 87,1% | 0,405 |
| 3. Los niños con asma tienen las vías aéreas pulmonares anormalmente sensibles | 81,3% | 83,3% | 85,4% | 0,500 |
| 4. Si un niño en una familia tiene asma, entonces casi seguro que todos sus hermanos y hermanas la padecerán también | 79,2% | 72,9% | 93,7% | 0,829 |
| 5. La mayoría de los niños con asma sufren un aumento de mucosidad cuando beben leche de vaca | 66,7% | 64,6% | 85,4% | 0,677 |
| 6. Anote todas las cosas que sabe que precipitan un ataque de asma (a veces llamados factores desencadenantes) | 2,1% | 2,1% | 100% | 1,000 |
| 7. Durante un ataque de asma los pitos pueden deberse a la contracción muscular de la pared de las vías aéreas pulmonares | 60,4% | 62,5% | 93,7% | 0,868 |
| 8. Durante un ataque de asma, los pitos pueden deberse a la inflamación del revestimiento de las vías aéreas pulmonares | 60,4% | 68,8% | 79,2% | 0,548 |
| 9. El asma daña el corazón | 52,1% | 41,7% | 81,3% | 0,628 |
| 10. Anote dos tratamientos (medicinas) para el asma que se toman regularmente todos los días para evitar que se produzcan ataques de asma | 0% | 2,1% | 97,9% | --- |
| 11. ¿Qué tratamientos (medicinas) para el asma son útiles durante un ataque? | 10,4% | 14,6% | 87,6% | 0,431 |
| 12. Los antibióticos son una parte importante del tratamiento para la mayoría de los niños con asma | 83,3% | 77,1% | 93,8% | 0,804 |
| 13. La mayoría de niños con asma no deberían consumir productos lácteos | 68,8% | 70,8% | 85,4% | 0,654 |
| 14. Las vacunas para la alergia curan el asma | 83,3% | 85,4% | 85,4% | 0,447 |
| 15. Si una persona muere de un ataque de asma, esto normalmente quiere decir que el ataque final debió de haber comenzado tan rápidamente que no hubo tiempo para empezar ningún tratamiento | 66,7% | 62,5% | 83,4% | 0,636 |
| 16. Las personas con asma normalmente tienen “problemas de nervios” | 68,8% | 64,6% | 83,3% | 0,626 |
| 17. El asma es infeccioso (es decir, te lo puede contagiar otra persona) | 93,8% | 91,7% | 98,0% | 0,846 |
| 18. Los medicamentos inhalados para el asma (ej., Ventolín, Terbasmín) tienen menos efectos secundarios que las pastillas/jarabes | 29,2% | 27,1% | 72,9% | 0,330 |
| 19. Los ciclos cortos de corticoides orales (como Estilsona, Dacortín, Prednisona) habitualmente causan efectos secundarios importantes | 58,3% | 52,1% | 81,2% | 0,622 |
| 20. Algunos tratamientos para el asma (ej. Ventolín) dañan el corazón | 70,8% | 66,7% | 83,3% | 0,613 |
| 21. Un niño de 5 años sufre un ataque de asma y toma dos inhalaciones de Ventolín inhalador. Después de 5 minutos no mejora. Dé algunas razones de por qué puede haber pasado esto. | 0% | 2,1% | 97,9% | --- |
| 22. Durante un ataque de asma que están tratando en casa su hijo necesita el inhalador con cámara (o mascarilla) cada 2 horas. Está mejorando pero después de 2 horas respira con dificultad. Teniendo en cuenta que el niño no empeora, es correcto continuar con el tratamiento cada 2 horas. | 50,0% | 52,1% | 68,7% | 0,375 |
| 23. Anote formas de ayudar a prevenir ataques de asma mientras se hace ejercicio | 4,2% | 4,2% | 100% | 1,000 |
| 24. Los niños con asma se hacen adictos a sus medicinas | 68,8% | 68,8% | 83,3% | 0,612 |
| 25. La natación es el único deporte adecuado para los asmáticos | 85,4% | 85,4% | 95,8% | 0,833 |
| 26. El hecho de que los padres fumen puede empeorar el asma del hijo/a | 89,6% | 85,4% | 95,8% | 0,810 |
| 27. Con el tratamiento adecuado, la mayoría de los niños con asma deberían llevar una vida normal sin restricciones en sus actividades | 87,5% | 85,4% | 97,9% | 0,911 |
| 28. La mejor manera de medir la gravedad del asma de un niño es que el médico le escuche el pecho | 58,3% | 54,2% | 75,1% | 0,493 |
| 29. El asma es normalmente más problemática durante la noche que durante el día | 43,8% | 43,8% | 87,5% | 0,746 |
| 30. La mayoría de los niños con asma padecen un enlentecimiento de su crecimiento | 79,2% | 75,0% | 83,4% | 0,529 |
| 31. Los niños con síntomas frecuentes de asma deberían tomar medicinas preventivas | 62,5% | 62,5% | 91,6% | 0,822 |

**Documento online-Tabla 4. Fiabilidad test-retest del cuestionario** **NewCastle Asthma Knowledge Questionnaire (NAKQ) de conocimientos acerca del asma en una muestra de n=48 profesores.**
